# Supplementary material for: Self-Advocacy and Influencing Factors in Post-Surgical Breast Cancer Patients: A Latent Profile Analysis
Source: Research Square preprint supplement (doi:10.21203/rs.3.rs-6632387/v1), 2025-07-02
Supplement: Supplementary file 1 [file c223ccc2f66266786578d6f7.docx]

# ANR Manuscript Checklist

This checklist is intended to ensure that your manuscript submission to Asian Nursing Research (ANR) complies with essential requirements.

| Item No. | Checklist Item | Completed (Yes/No) |
| --- | --- | --- |
| 1 | Title page includes all authors’ names, affiliations, ORCID, and corresponding author contact info | Yes |
| 2 | Structured abstract includes background, methods, results, and conclusion | Yes |
| 3 | Ethics approval has been obtained and stated in the manuscript | Yes |
| 4 | Conflict of interest statement is included | Yes |
| 5 | Funding source is disclosed with role of funders specified | Yes |
| 6 | Author contributions are clearly defined | Yes |
| 7 | Appropriate reporting guideline checklist (e.g., STROBE, CONSORT) is submitted | No |
| 8 | References are formatted according to NLM style | Yes |
| 9 | Tables and figures are included and cited in the text | Yes |
| 10 | All necessary files (manuscript, checklist, cover letter, etc.) are uploaded to the submission system | Yesa |
